# Supplementary material
Source: publisher figshare collection journal article supplement (https://acs.figshare.com/ndownloader/files/20099624)
Supplement: Supplementary file 1 [file 20099624]

Supporting Information for  
**Microbiome for the Electrosynthesis of Chemicals from Carbon Dioxide**

Edward V. LaBelle (Harvard University), Christopher W. Marshall (Marquette University), and

Harold D. May (Medical University of South Carolina)

Corresponding author

Harold D. May, Professor

Hollings Marine Laboratory, H212-D

Department of Microbiology & Immunology

Medical University of South Carolina

331 Fort Johnson Road

Charleston, SC 29412-9112

Ph. 843-876-2404

[mayh@musc.edu](mailto:mayh@musc.edu)

**Cultivation of *Cutaneotrichosporon oleaginosum* strain D**

*Cutaneotrichosporon oleaginosum* strain D (ATCC 20509) was originally revived from frozen stock in YPD medium containing 10 g/L yeast extract, 20 g/L peptone, and 20 g/L dextrose.

Following this, it was then routinely grown on the phosphate-based medium with 50 mM NaCl described in LaBelle 2014 and LaBelle 2017. Additionally, this medium was amended with 3 g/L (NH<sub>4</sub>)<sub>2</sub>(SO<sub>4</sub>), 0.1 g/L yeast extract, and 5 g/L acetic acid, and brought to a pH of 7 with KOH. 50 mL cultures were maintained in 300 mL Nephelo flasks at 30° C and shaking at 180 RPM. For the experiment with real microbial electrosynthesis effluent, the effluent was brought up to 5 g/L with acetic acid, and to pH=7 with KOH, amended with 3 g/L (NH<sub>4</sub>)<sub>2</sub>(SO<sub>4</sub>) and 0.1

g/L yeast extract. The flasks were inoculated with a 10% v/v culture that had been transferred away from YPD medium over 25 times. Cell dry weight was calculated using a regression curve calibrated from optical density measured at 600 nm and 50 mL cell cultures that were centrifuged (10,000 x g), washed with deionized water, and dried overnight to constant weight at 105° C on aluminum cups ( $\text{g/L}_{\text{cdw}} = 0.5637 \cdot \text{OD}_{600}$ ,  $R^2=0.9986$ ).

## References

LaBelle, Edward V, C W Marshall, Jack A Gilbert, and Harold D. May. 2014. “Influence of Acidic pH on Hydrogen and Acetate Production by an Electrosynthetic Microbiome.” *PLoS ONE* 9 (10): 1–10. doi:10.1371/journal.pone.0109935.

LaBelle, Edward V, and Harold D. May. 2017. “Energy Efficiency and Productivity Enhancement of Microbial Electrosynthesis of Acetate.” *Frontiers in Microbiology* 8 (May): 2059. doi:10.1021/acs.est.6b01601.
